# Supplementary material for: Inhibition of HDAC6 by Tubastatin A reduces chondrocyte oxidative stress in chondrocytes and ameliorates mouse osteoarthritis by activating autophagy
Source: publisher site journal article supplement (doi:10.18632/aging.202736), 2021-03-19
Supplement: Supplementary file [file aging-v13i7-202736-supplementary-material-SD1.pdf]

**SUPPLEMENTARY FIGURES**

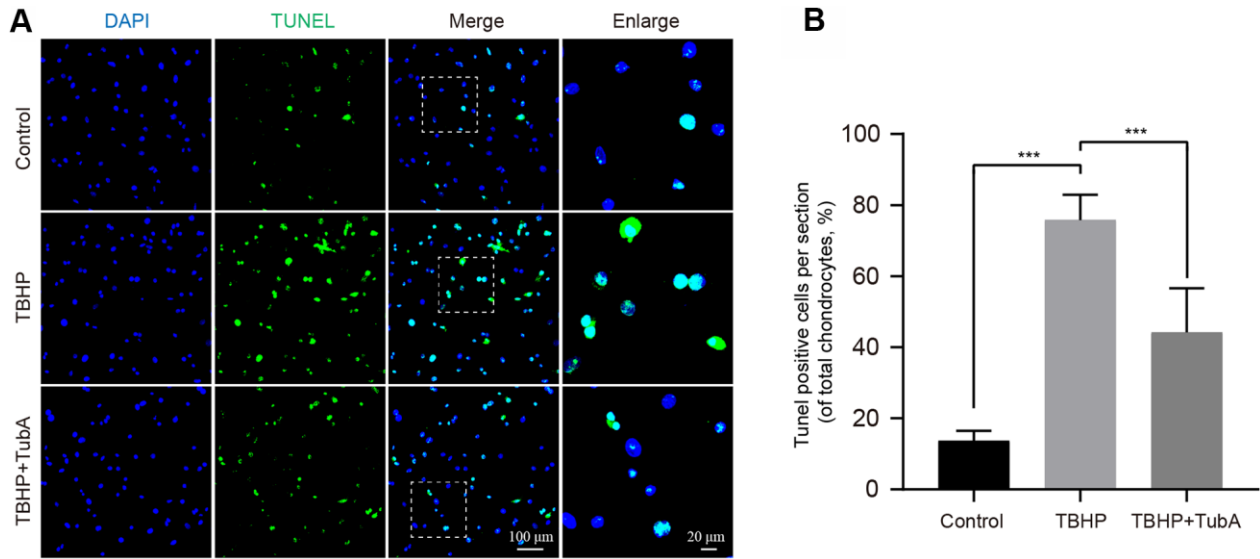

**Supplementary Figure 1. Inhibition of HDAC6 by TubA prevents TBHP-induced apoptosis in chondrocytes. (A, B)** TUNEL staining quantification of positive cells in each group of chondrocytes, scale bar = 100  $\mu$ m, scale bar (enlarged) = 20  $\mu$ m.

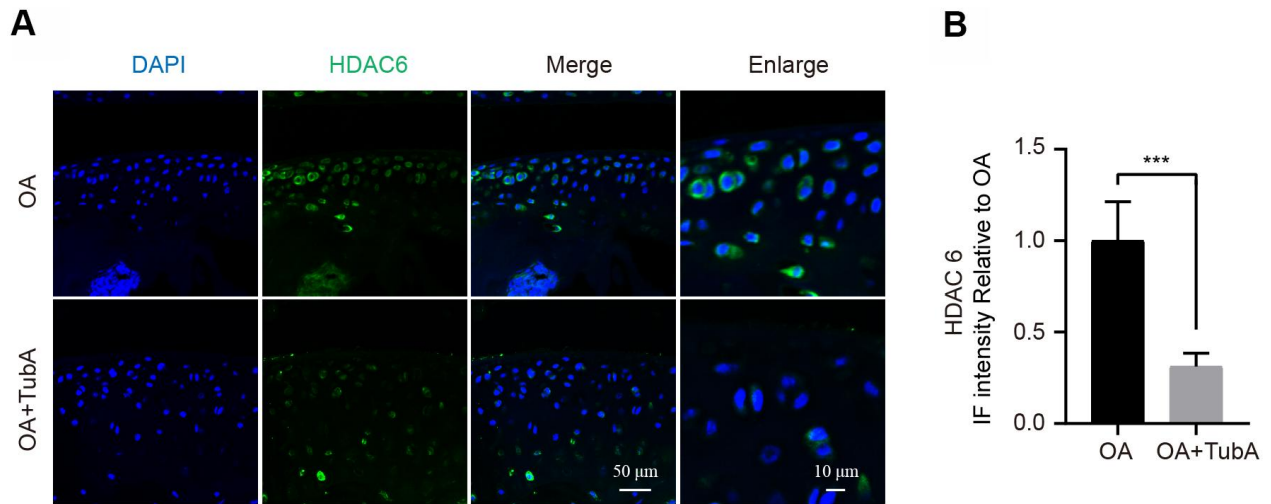

**Supplementary Figure 2. TubA treatment decreases HDAC6 expression in OA mice. (A, B)** IF staining and quantification of the changes in HDAC6 in each group of mice, scale bar = 50  $\mu$ m, scale bar (enlarged) = 10  $\mu$ m.
